# Supplementary material
Source: PubMed Central journal article supplement (PMC6768765)
Supplement: NIHMS1527827-supplement-Supplemental_Digital_Content_to_Be_Published__cited_in_text__3.pdf [file NIHMS1527827-supplement-Supplemental_Digital_Content_to_Be_Published__cited_in_text__3.pdf]

Figure S1

A

Rabbit IgG isotype control

Anti-laminin  $\alpha 4$

Naive

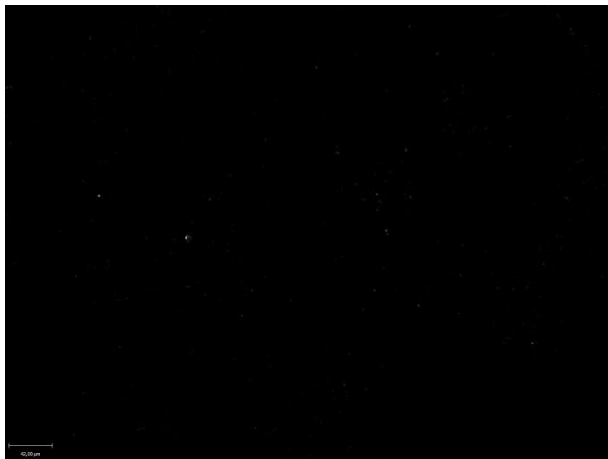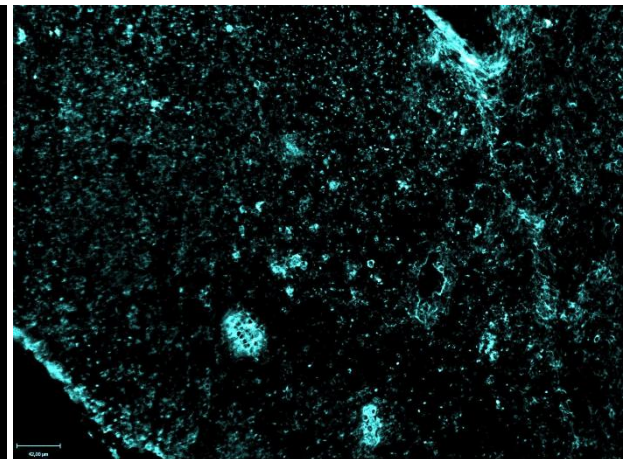

CFA

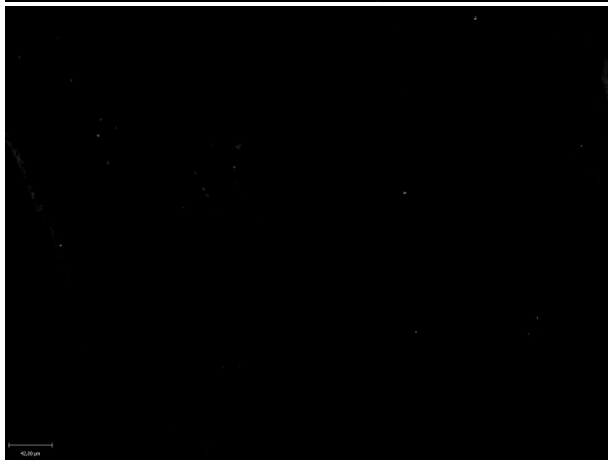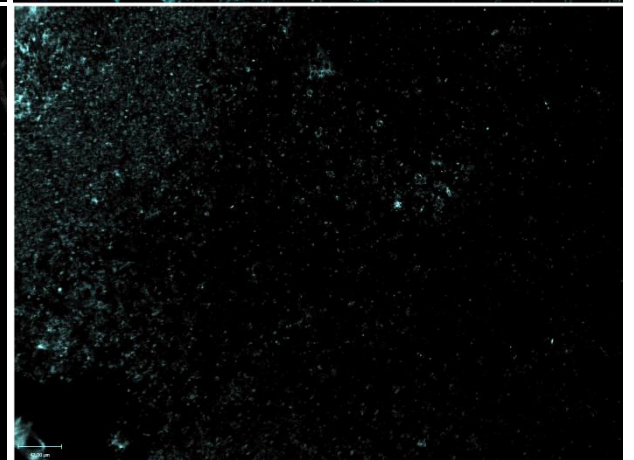

DST

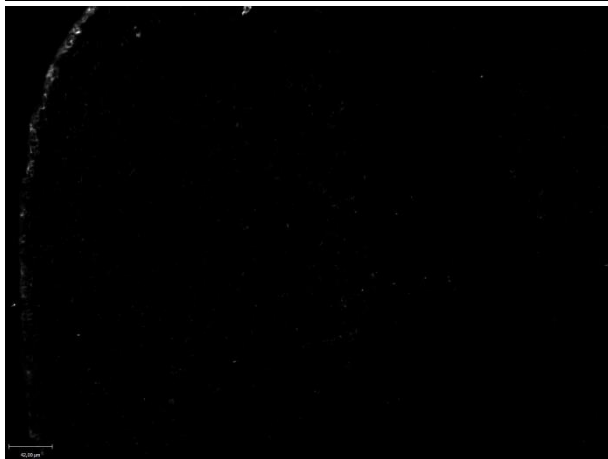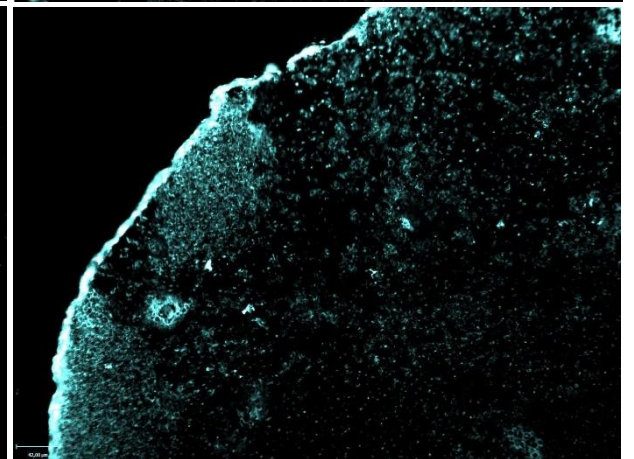

DST  
+  
aCD40L

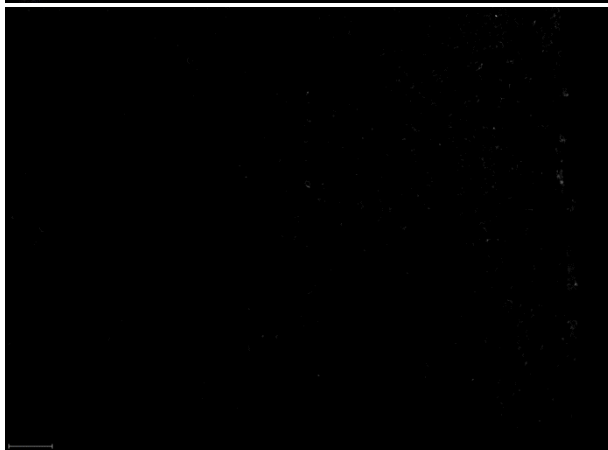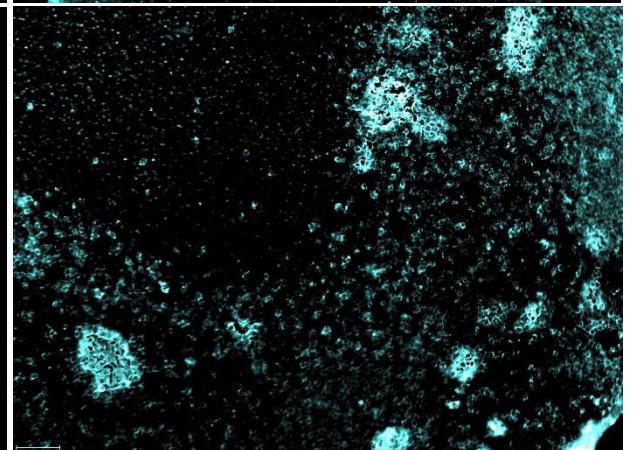

Figure S1

B

Rat IgG2a isotype control

Anti-laminin  $\alpha 5$

Naive

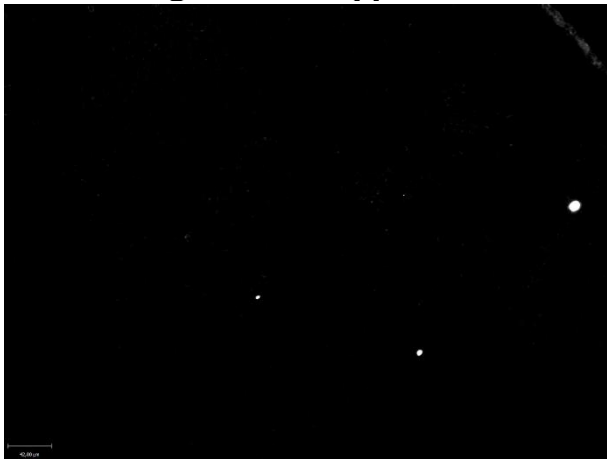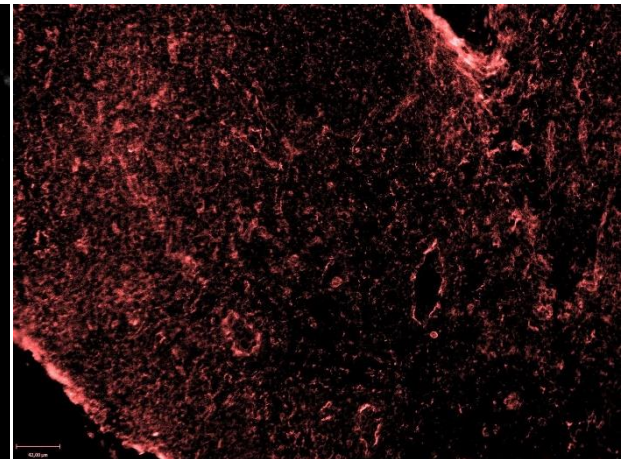

CFA

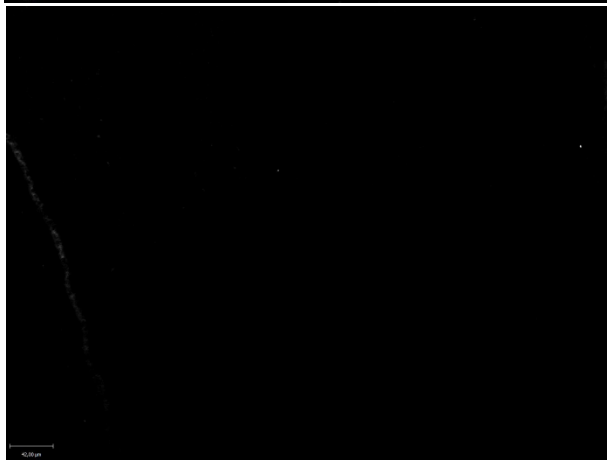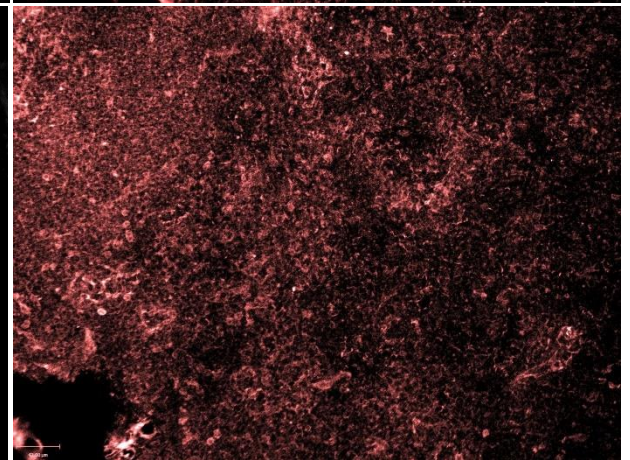

DST

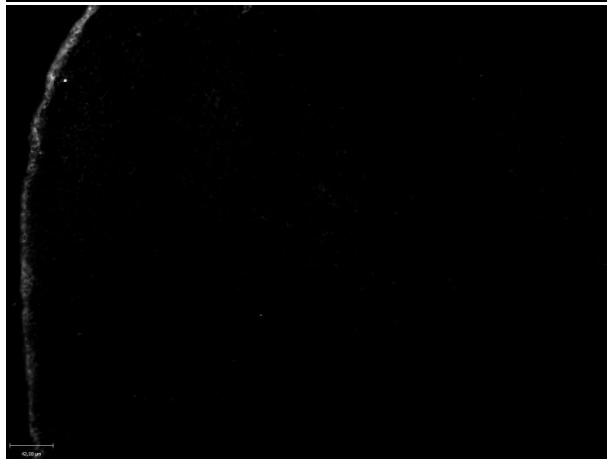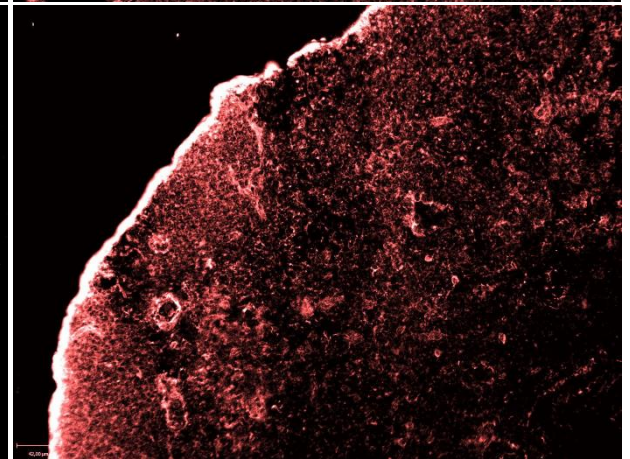

DST  
+  
aCD40L

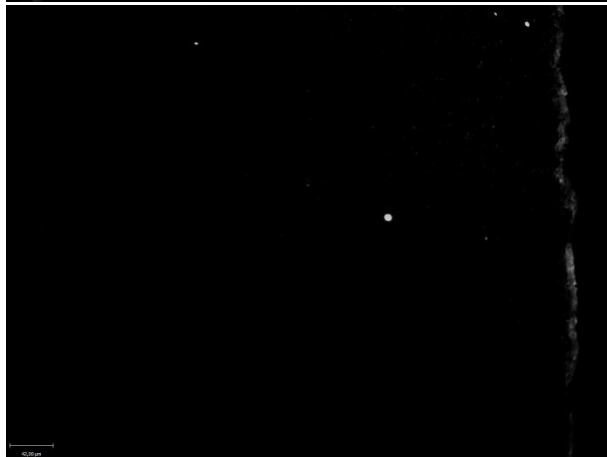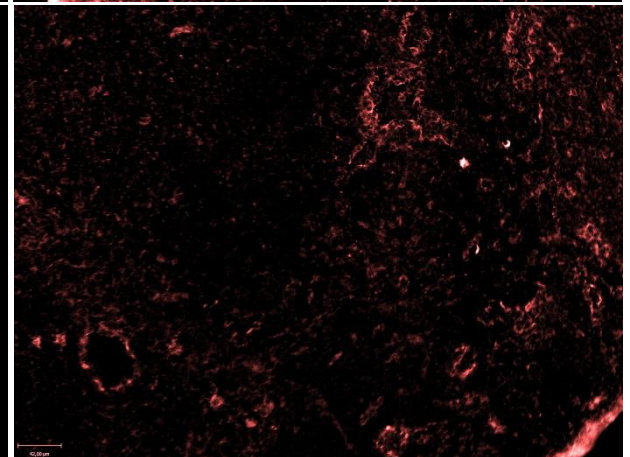

# Figure S2

## A

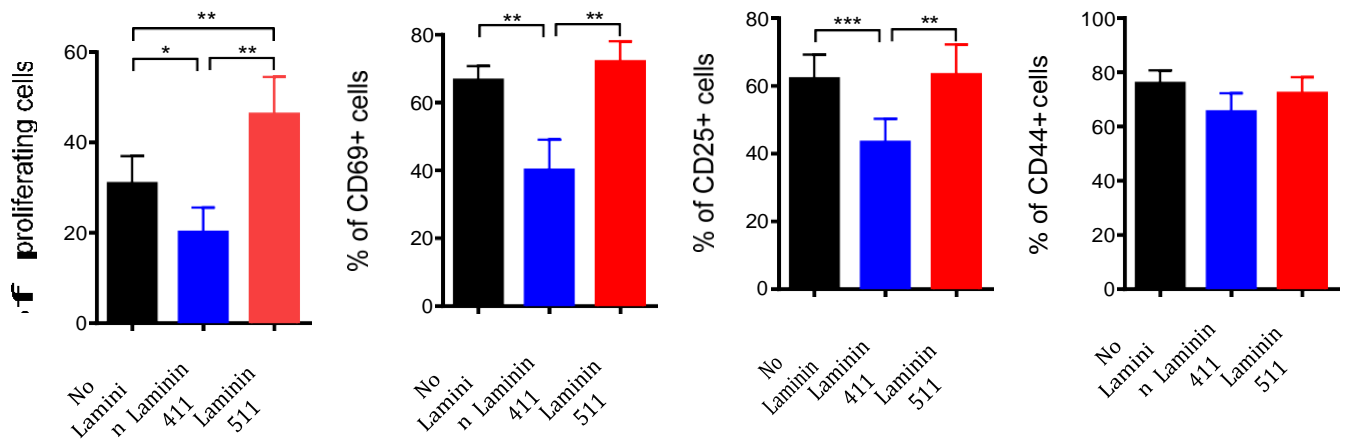

## B

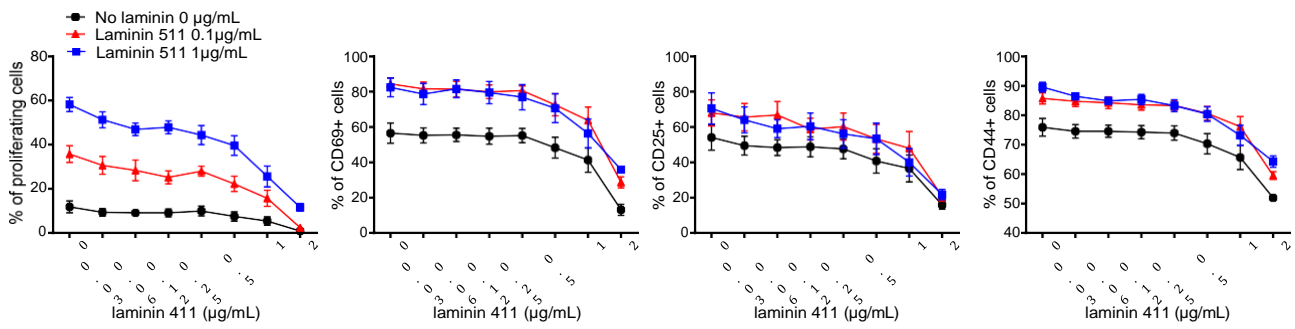

## C

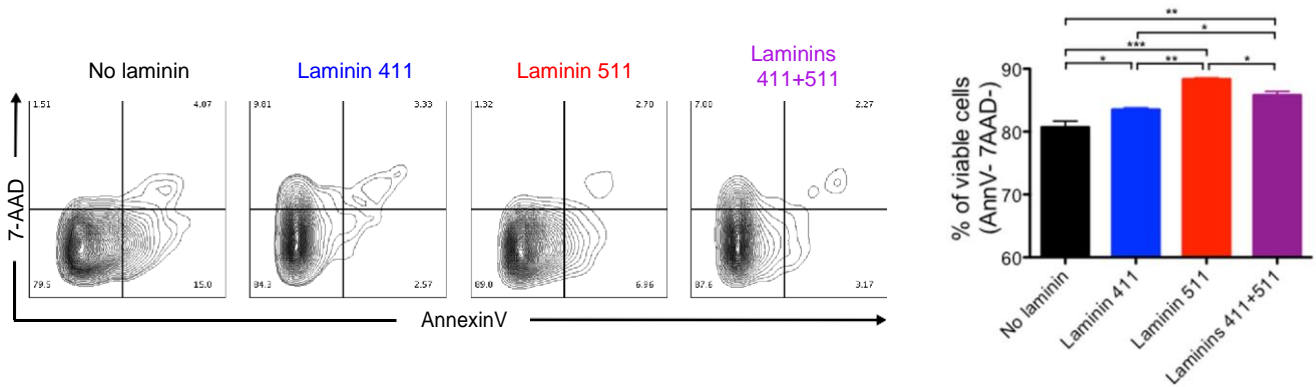

## D

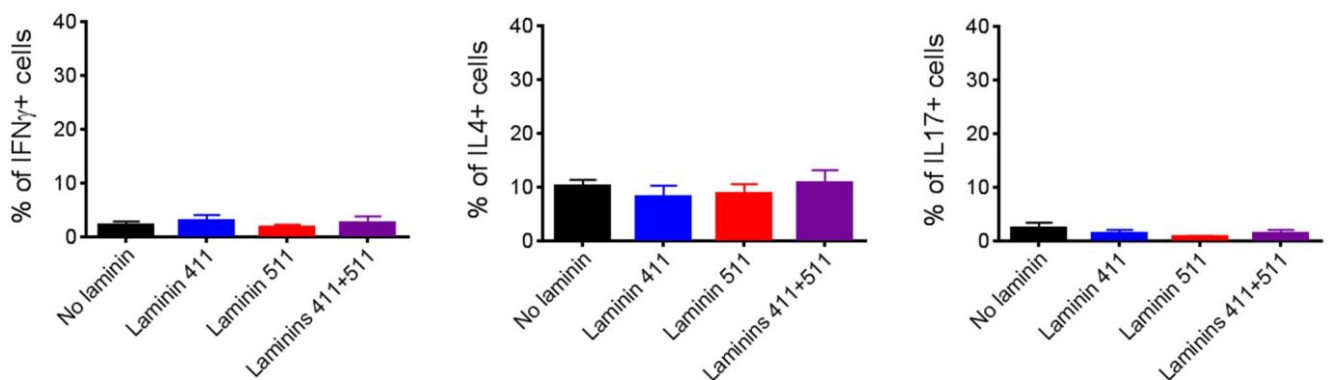

# Figure S3

A

DST

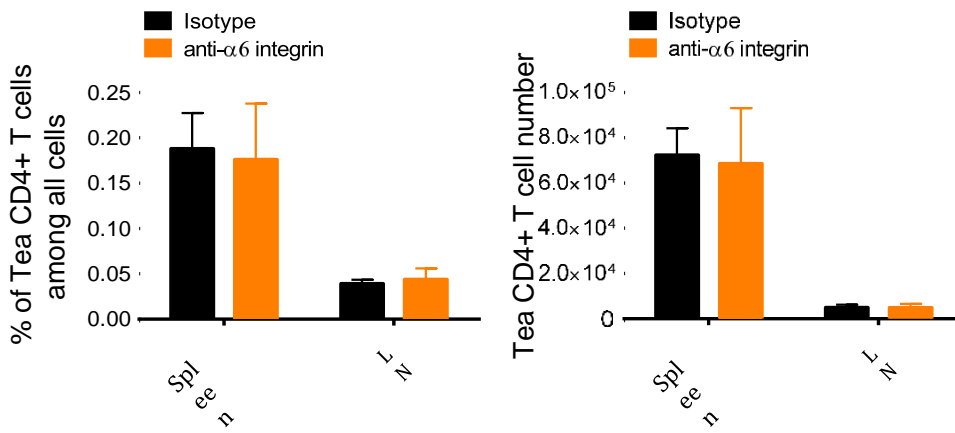

CFA

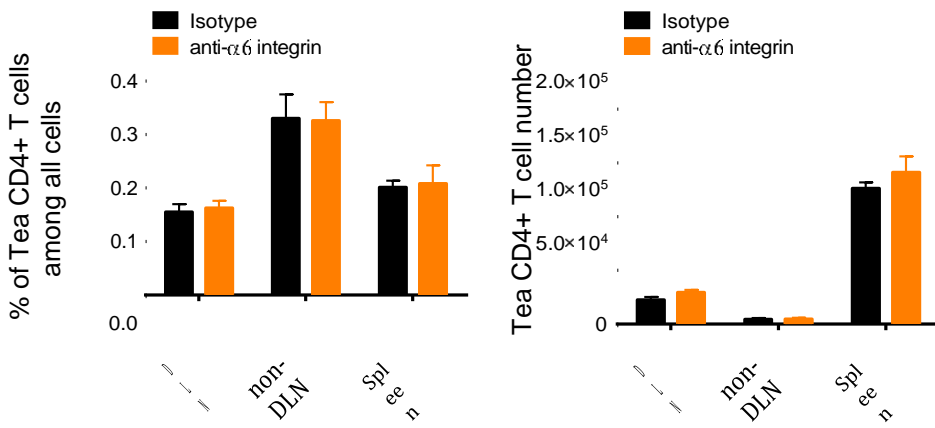

B

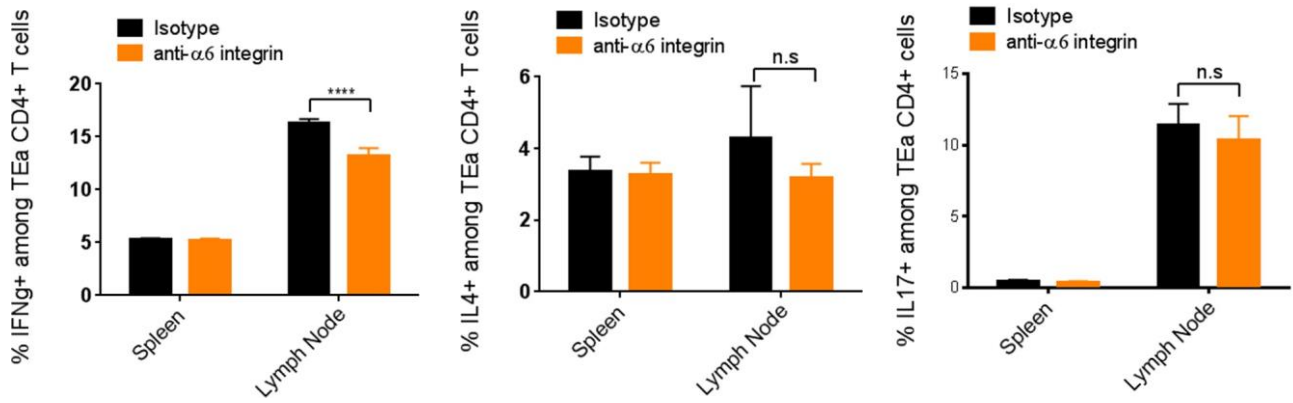

Figure S4

A

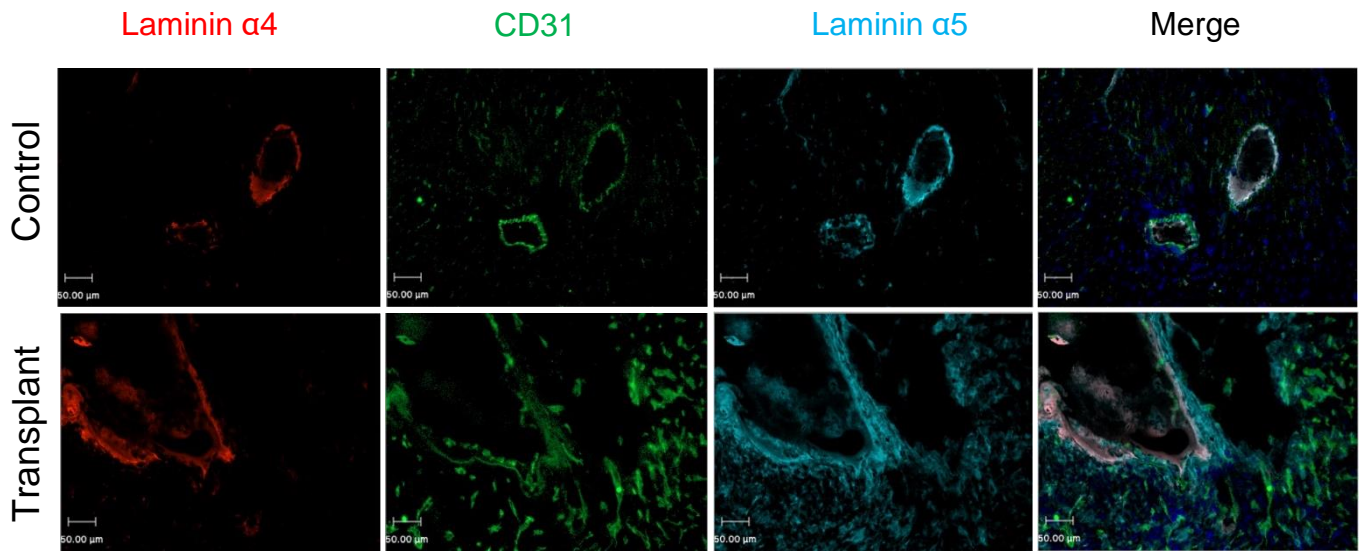

B

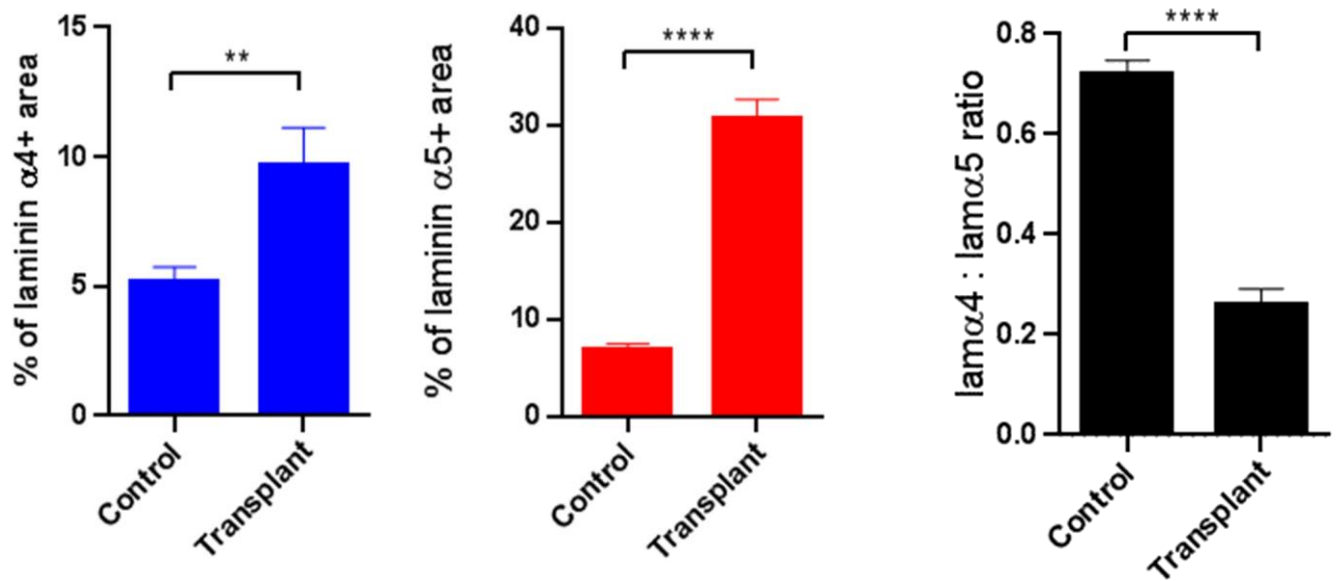

**Figure S1.** Laminin  $\alpha 5$  and laminin  $\alpha 4$  expression differentially regulated in the lymph node following the induction of inflammation, immunity or tolerance. Skin LNs from naive, CFA, DST, DST+anti-CD40L treated C57BL/6 mice isolated 5 hours after treatment. All LNs sectioned and stained for laminin  $\alpha 4$  or rabbit isotype control (A), laminin  $\alpha 5$  and rat isotype control (B). Representative images: X100.

**Figure S2.** A, Stromal laminin 411 and 511 differentially modulate CD4<sup>+</sup> T cell activation with anti-CD3 at 5  $\mu\text{g}/\text{mL}$ . CD4 T lymphocytes evaluated by flow cytometry for proliferation and CD69, CD25, CD44 expression after 3 days of culture in plates coated with anti-CD3 (5  $\mu\text{g}/\text{mL}$ ), with or without laminin 411 (2  $\mu\text{g}/\text{mL}$ ) or laminin 511 (1  $\mu\text{g}/\text{mL}$ ). Data are shown as mean  $\pm$  SEM of 4 independent experiments. \* $P < 0.05$ , \*\* $P < 0.01$ , \*\*\* $P < 0.001$ . B, The effects of laminins 411 and 511 on CD4<sup>+</sup> T cell activation are dose dependent. CD4 T lymphocytes evaluated by flow cytometry for proliferation and CD69, CD25, CD44 expression after 3 days of culture in plates coated with anti-CD3 (1  $\mu\text{g}/\text{mL}$ ) and the indicated concentrations of laminin 411 or laminin 511. Data shown as mean  $\pm$  SEM of 3 independent experiments. \* $P < 0.05$ , \*\* $P < 0.01$ , \*\*\* $P < 0.001$ . C, Stromal laminin 411 and 511 improve CD4<sup>+</sup> T cell viability. CD4 T lymphocytes evaluated by flow cytometry for viability after 3 days of culture in plates coated with anti-CD3 (1  $\mu\text{g}/\text{mL}$ ) and with laminin 411 (2  $\mu\text{g}/\text{mL}$ ) and/or laminin 511 (1  $\mu\text{g}/\text{mL}$ ). Data shown as representative profiles and mean  $\pm$  SEM of 3 independent experiments with samples. \* $P < 0.05$ , \*\* $P < 0.01$ , \*\*\* $P < 0.001$ . D, Laminin 411 and 511 had no impact on Th1, Th2 and Th17 polarization in a neutral environment. CD4 T lymphocytes evaluated by flow cytometry for intracellular expression of IFN $\gamma$ , IL4 or IL17 after 5 days of culture with coated anti-CD3 and soluble anti-CD28, with laminin 411 (2  $\mu\text{g}/\text{mL}$ ) and/or laminin 511. Data are shown as mean  $\pm$  SEM of at least 3 independent experiments with duplicate samples.

**Figure S3.** A, Targeting the laminin 511 receptors  $\alpha 6$  integrin did not interfere with the proportion and the number of TEa CD4<sup>+</sup> in the lymph node. DST- or CFA/Ea-treated mice received  $5 \times 10^6$  CFSE-labeled CD45.1 TEa TCR transgenic CD4<sup>+</sup> T cells. Mice were euthanized 2 days post transfer, and the proportion and the number of donor lymphocytes from spleen and skin LNs were assessed by flow cytometry. Data are shown as mean  $\pm$  SEM of at least 5 mice per group from 3 independent experiments. B, Targeting the laminin 511 receptors  $\alpha 6$  integrin reduced the induction of Th1 but not Th2 and Th17 lymphocytes. CFA/Ea-treated mice received  $5 \times 10^6$  CFSE-labeled CD45.1 TEa TCR transgenic CD4<sup>+</sup> T cells, with or without anti- $\alpha 6$  integrin mAb (10  $\mu\text{g}$  i.v.), were euthanized three days post transfer, and donor lymphocytes from spleen and skin LNs assessed as percentage of IFN $\gamma$ , IL4, or IL17<sup>+</sup> donor cells (CD4<sup>+</sup> CD45.1<sup>+</sup>) in different organs by flow cytometry after ex vivo activation. Data are shown as mean  $\pm$  SEM of 8–10 mice per group from at least 2 independent experiments.

**Figure S4.** Laminin  $\alpha 5$  and laminin  $\alpha 4$  expression differentially regulated in the cardiac transplant following rejection. Hearts from Balb/c freshly isolated (control) or isolated 5 days after transplantation into C57BL/6 recipient (transplant). All hearts sectioned and stained for laminin  $\alpha 4$ , laminin  $\alpha 5$ , and CD31. A, Representative images, X100. B, Percentages of laminin  $\alpha 4$  and laminin  $\alpha 5$  positive areas, and the ratios of laminin  $\alpha 4$ : laminin  $\alpha 5$ . Data are shown as mean  $\pm$  SEM.  $n =$  at least 5 mice per condition; \*\* $P < 0.01$ , \*\*\*\* $P < 0.0001$ .

**Table S1. Antibodies for immunohistochemistry**

| Target Molecule    | Source | Clone      | Company                |
|--------------------|--------|------------|------------------------|
| Laminin $\alpha$ 4 | Rat    | 775830     | RnD                    |
| Laminin $\alpha$ 5 | Rabbit | Polyclonal | Novus Biological       |
| PNAd               | Rat    | MECA-79    | BD Biosciences         |
| ER-TR7 (AF488)     | Rat    | sc-73355   | Santa Cruz             |
| Rabbit IgG         | Goat   | Polyclonal | Jackson ImmunoResearch |
| Rat IgG            | Goat   | Polyclonal | Jackson ImmunoResearch |
| Rabbit IgG         | Donkey | Polyclonal | Jackson ImmunoResearch |
| Rat IgM            | Goat   | Polyclonal | Jackson ImmunoResearch |

## SDC, Materials and Methods

**Mice.** C57BL/6 (H-2b) and BALB/c (H-2d) mice were purchased from The Jackson Laboratories (Bar Harbor, ME). T cell receptor transgenic (Tg) mice expressing the TEa TCR (recognizing I-Ae antigen in the context of I-Ab) were acquired from A.Y. Rudensky (Memorial Sloan Kettering Cancer Center, New York, NY).<sup>1</sup> Mice were used at 8–12 weeks of age, and all experiments were performed with age- and sex-matched mice. Animals were housed under specific-pathogen-free conditions. Animal care and experimental procedures were approved by the University

**Cell preparations.** LNs and spleen were collected from TEa TCR Tg or C57BL/6 mice, and tissue was passed through a 70- $\mu$ m cell strainer for homogenization. CD4<sup>+</sup> T cell isolation was completed using the EasySep Mouse CD4<sup>+</sup> T cell Enrichment Kit according to the manufacturer's recommendations (StemCell Technologies, Vancouver, British Columbia, Canada). Purity of 95%–99% was confirmed by flow cytometry for each experiment. Cells were labeled with CFSE according to the manufacturer's instructions (Thermo Fisher Scientific, Waltham, MA).

**Immunohistochemistry.** LNs and heart were excised and immediately submerged in OCT compound (Sakura Finetek, Torrance, CA). LNs were isolated 5 hours after DST, anti-CD40L and CFA treatment and 24 hours after MC38 injection or DSS treatment. Hearts were isolated 5 days after cardiac transplant. Tissues in OCT were quickly frozen using dry ice, then kept at  $-80^{\circ}\text{C}$  for long-term storage. LN cryosections were cut in triplicate at 6  $\mu$ m using a Microm HM 550 cryostat (Thermo Fisher Scientific). Sections were fixed with cold acetone/methanol (v/v: 1:1) for 5 minutes, then washed in PBS. Primary antibodies were diluted 1:100–1:200 in PBS and incubated for 1 hour in a humidified chamber (Table S1). Sections were washed twice with PBS, and secondary antibodies were applied at 1:100–1:400 dilutions for 45 minutes (Table S1). Slides were washed twice in PBS for 5 minutes, fixed with 4% paraformaldehyde, treated with 1% glycerol in PBS before coverslipping with ProLong Gold Antifade Mountant (Thermo Fisher Scientific) and imaged under a fluorescent microscope. The lymph node cortical ridge area, HEV area and laminin  $\alpha$ 4 and  $\alpha$ 5 positive area were defined as described in Ref. 2 with Volocity image analysis software (PerkinElmer, Waltham, MA). Briefly, the region of interest (ROI) corresponding to HEV is defined manually by ER-TR7 and PNA<sup>d</sup> co-staining. The ROI corresponding to the cortical ridge is defined manually by ER-TR7+ fiber density between T and/or B cell areas with exclusion of HEV area. Valuation of IHC-positively stained laminin areas in the ROIs is measured in  $\mu\text{m}^2$  with Volocity Quantification module. The threshold for laminin positive area in the ROIs is defined for each LN section with laminin isotype staining on a consecutive 6  $\mu$ m- thick section. The percentage of laminin area is calculated with the following formula: % laminin x area = (laminin x area x 100)/ROI area.

**Human T-cell purification and culture.** Human CD4<sup>+</sup> T cells were purified from non-mobilized peripheral blood apheresis products (Memorial Blood Center, St. Paul, MN, USA) by negative selection using a kit and AutoMACS (Miltenyi Biotec, PosselD2 program). Purified CD4<sup>+</sup> T cells were labeled with CFSE (Invitrogen), stimulated with anti-CD3/28 mAb-coated beads (Dyna), and were plated in triplicate in 96-well flat-bottom plates coated with or without laminins. Cells were cultured in X-Vivo-15 (BioWhittaker, Walkersville, MD) media supplemented with 10% human AB serum (Valley Biomedical, Winchester, VA), L-glutamine (Invitrogen), N-acetylcysteine (American Regent, Shirley, NY), and recombinant IL-2 (50 IU/ml, Novartis). Cultures were harvested on day 3 and cells were stained with a live/dead marker (Zombie-dye, BioLegend), anti-CD25 and anti-CD4 mAb (OKT4, BioLegend) and data acquired by FACScalibur or LSRII.

**CD4 T cell differentiation environments.** For Th1 environment, IL2 (20ng/mL, eBioscience), IL12 (20ng/mL, R & D systems, Minneapolis, MN) and anti-IL4 mAb (10 ng/mL, clone 11B11, eBioscience) were added at initiation of culture. For Th2 polarization, IL2, IL4 (0.1 $\mu$ g/mL, Biolegend, Dedham, MA), anti-IFN $\gamma$  mAb (10ng/mL, clone XMG1.2, eBioscience) and anti-IL12 mAb (10ng/mL, clone C18.2, Biolegend) were added. For Th17 polarization, TGF $\beta$  (1 ng/mL, eBioscience) and IL6 (0.1  $\mu$ g/mL, Biolegend) were added. For Treg environment, TGF $\beta$  (5ng/mL, eBioscience) and IL2 were added.

**Flow cytometry analysis.** Surface markers and intracellular cytokines were detected by the following anti-mouse antibodies: CD4 (clone RM4-5, eBioscience), CD69 (clone H1.2F3, eBioscience), CD25 (clone PC61.5, eBioscience), CD44 (clone IM7, eBioscience),  $\alpha$ 6 integrin (Biolegend), P-Erk1/2 (Cell Signaling Technology, Danvers, MA), P-AktT (Cell Signaling Technology), P-P38 Mapk (clone 4NIT4KK, eBioscience), P-Stat3 (clone pY705, BD Bioscience), IFN $\gamma$  (clone XMG1.2, BD Bioscience), IL4 (clone 11B11, BD Bioscience), IL17 (clone eBio17B7, eBioscience), FoxP3 (clone FJK-16s, eBioscience), Ror $\gamma$ t (clone B2D, eBioscience), Irf4 (clone 3E4, eBioscience), Batf (clone S39-1060, BD Bioscience) and CD126 (clone M5, BD Bioscience). For intracellular cytokines, cells were fixed and permeabilized in cytofix/cytoperm buffer kit (BD Biosciences). For transcription factor staining, cells were fixed and permeabilized in Foxp3 fixation buffer kit (Invitrogen, Carlsbad, CA). Phospho-proteins were stained according to manufacturer's phosflow staining protocol (BD Biosciences). Samples were collected on a BDLSRII flow cytometry, and data analysis were generated in FlowJo (Treestar, Ashland, OR).

## SDC, References

1. Grubin CE, Kovats S, deRoos P, et al. Deficient positive selection of CD4 T cells in mice displaying altered repertoires of MHC class II-bound self-peptides. *Immunity*. 1997;7(2):197-208.
2. Warren KJ, Iwami D, Harris DG, et al. Laminins affect T cell trafficking and allograft fate. *J Clin Invest*. 2014;124(5):2204-2218.
